# Supplementary material for: Accuracy, Timing, and Clinical Utility of Early Neuroimaging and Decision Rules in Pediatric Traumatic Brain Injury: A Systematic Review
Source: Research Square preprint supplement (doi:10.21203/rs.3.rs-8119985/v1), 2025-11-19
Supplement: Supplementary file 1 [file 062bcbbcbb1ac687908a3a3b.docx]

**Appendix B – Risk of Bias Assessment**

This appendix summarizes the bias assessments conducted using validated tools:

- RoB 2 for randomized controlled trials

- QUADAS-2 for diagnostic accuracy studies

- ROBINS-I for non-randomized interventional studies

- AMSTAR-2 for systematic reviews

***B1. RoB 2 Summary for Included RCTs***

Domains assessed:

- Randomization process

- Deviations from intended interventions

- Missing outcome data

- Measurement of outcomes

- Selection of reported results

Summary:

Most included RCTs showed low to moderate risk of bias. No trial demonstrated high risk in more than two domains.

***B2. QUADAS-2 Summary for Diagnostic Accuracy Studies***

Domains assessed:

- Patient selection

- Index test

- Reference standard

- Flow and timing

Findings:

Most CT and MRI studies had low bias. Some POCUS/NIRS studies had unclear/high bias due to convenience sampling.

***B3. ROBINS-I Summary for Non-Randomized Studies***

Domains:

- Confounding

- Participant selection

- Intervention classification

- Deviations from interventions

- Missing data

- Outcome measurement

- Reporting

Findings:

Implementation studies generally had moderate risk of bias.

***B4. AMSTAR-2 Summary for Systematic Reviews***

Two systematic reviews were assessed. Both scored moderate confidence due to limitations in protocol registration and bias reporting.
