# Supplementary material for: Accuracy, Timing, and Clinical Utility of Early Neuroimaging and Decision Rules in Pediatric Traumatic Brain Injury: A Systematic Review
Source: Research Square preprint supplement (doi:10.21203/rs.3.rs-8119985/v1), 2025-11-19
Supplement: Supplementary file 2 [file 6bdf12fda14792226146b301.docx]

**Appendix A. Database Search Strategies (2018–2024)**

This appendix provides the full electronic search strategies used in the systematic review. Searches were conducted from January 1, 2018 to December 31, 2024, limited to English-language studies and human subjects.

Databases searched:

- PubMed (MEDLINE)

- Embase

- Scopus

- Web of Science Core Collection

**A1. PubMed (MEDLINE) Search Strategy**

(pediatric OR child OR children OR infant OR adolescent) AND

(head injury OR traumatic brain injury OR TBI OR head trauma) AND

(CT OR "computed tomography" OR MRI OR "rapid MRI" OR "quick brain" OR ultrasound OR POCUS OR

"near infrared spectroscopy" OR NIRS) AND

(PECARN OR CATCH OR CHALICE OR "clinical decision rule") AND

("2018/01/01"[Date - Publication] : "2024/12/31"[Date - Publication])

Filters applied: Humans, English, infant–adolescent.

**A2. Embase Search Strategy**

('pediatric' OR 'child' OR 'adolescent') AND

('head injury'/exp OR 'brain injury'/exp OR 'traumatic brain injury') AND

('computed tomography'/exp OR 'magnetic resonance imaging'/exp OR 'ultrasound'/exp OR 'near infrared spectroscopy') AND

('PECARN' OR 'CATCH' OR 'CHALICE')

AND [2018–2024]/py

**A3. Scopus Search Strategy**

TITLE-ABS-KEY (pediatric OR child OR children OR infant OR adolescent)

AND TITLE-ABS-KEY ("head trauma" OR "traumatic brain injury" OR TBI)

AND TITLE-ABS-KEY (CT OR MRI OR "rapid MRI" OR ultrasound OR POCUS OR NIRS)

AND TITLE-ABS-KEY (PECARN OR CATCH OR CHALICE)

AND PUBYEAR > 2017 AND PUBYEAR < 2025

**A4. Web of Science Search Strategy**

TS=(pediatric OR child OR infant OR adolescent)

AND TS=("head trauma" OR "traumatic brain injury" OR TBI)

AND TS=(CT OR MRI OR "rapid MRI" OR ultrasound OR POCUS OR NIRS)

AND TS=(PECARN OR CATCH OR CHALICE)

Refined by: English, 2018–2024
