# Supplementary material for: Accuracy, Timing, and Clinical Utility of Early Neuroimaging and Decision Rules in Pediatric Traumatic Brain Injury: A Systematic Review
Source: Research Square preprint supplement (doi:10.21203/rs.3.rs-8119985/v1), 2025-11-19
Supplement: Supplementary file 3 [file b484e5af36364e2c88a727cf.docx]

**Appendix C – Data Extraction Template**

The following template was used for standardized extraction of study characteristics and outcomes:

| Category | Data Extracted |
| --- | --- |
| Study Identification | First author, year, country, journal |
| Study Design | RCT, cohort, diagnostic, QI study |
| Participants | Sample size, age range, inclusion/exclusion criteria |
| Intervention / Index Test | CT, MRI, rapid MRI, POCUS, NIRS, PECARN, CATCH, CHALICE |
| Reference Standard | CT, clinical follow-up, MRI confirmation |
| Outcomes | Sensitivity, specificity, NPV, PPV, ciTBI, CT use, sedation, neurosurgery |
| Risk of Bias Domains | As per RoB2, QUADAS-2, ROBINS-I |
| Notes | Implementation features, limitations, funding |
